# Supplementary material for: Spectral properties of B40 enhanced by small molecule adsorption
Source: Royal Society of Chemistry journal article supplement (doi:10.1039/d3ra04631a), 2023-01-01
Supplement: d3ra04631a1.pdf [file d3ra04631a1.pdf]

## **Electronic Supplementary information**

# **Spectral properties of B<sub>40</sub> enhanced by small molecule adsorption**

Jia Wang,<sup>a</sup> Yunkai Zhang,<sup>a</sup> Meiqi Wang,<sup>a</sup> Ming-xing Song,<sup>a</sup> Bo Wang<sup>\*b</sup> and Zhengkun Qin <sup>\*a</sup>

<sup>a</sup>. College of Information Technology, Jilin Engineering Research Center of Optoelectronic Materials and Devices, Jilin Normal University, Siping, 136000, China.

<sup>b</sup>. School of Science, Northeast Electric Power University, Jilin, 131200, China

E-mails: bowang@neepu.edu.cn and qzkjlnu@163.com

### **Content**

**Part 1. The adsorption energy analysis**

**Part 2. The calculation details about structural optimization**

**Part 3. The analysis of electronic density difference.**

### Part 1. The adsorption energy analysis

The formula for calculating adsorption energy as follows:

$$E_{\text{abs}} = E(\text{benzene-B}_{40}) - E(\text{B}_{40}) - E(\text{benzene}) - E(\text{BSSE})$$

Wherein,  $E_{\text{abs}}$  the adsorption energy,  $E(\text{benzene-B}_{40})$  is the energy obtained from the optimized structures of benzene-B<sub>40</sub>-6 and benzene-B<sub>40</sub>-7,  $E(\text{B}_{40})$  is the structural energy obtained from B<sub>40</sub> optimization, and  $E(\text{benzene})$  is the structural energy obtained from the optimized structure of benzene,  $E(\text{BSSE})$  refers to the basis set superposition error (BSSE) for the adsorption energy was corrected by implementing the counterpoise method.<sup>S1-S3</sup> And the calculation results are  $|E_{\text{abs}}(\text{benzene-B}_{40-6})| = 1.45$  eV,  $|E_{\text{abs}}(\text{benzene-B}_{40-7})| = 1.44$  eV, thus the former is the more stable structure.

### Part 2. The calculation details about structural optimization

All the computations are carried out using the Gaussian16 software package.<sup>28</sup> The convergence threshold of optimization are set to  $4.5 \times 10^{-4}$  Ha/Bohr for the Maximum Force,  $3 \times 10^{-4}$  Ha/Bohr for RMS Force,  $1.8 \times 10^{-3}$  Bohr for Maximum Displacement and  $1.2 \times 10^{-3}$  Bohr for RMS Displacement. For SCF, The density is converged to  $10^{-8}$ .

### Part 3. The analysis of electronic density difference

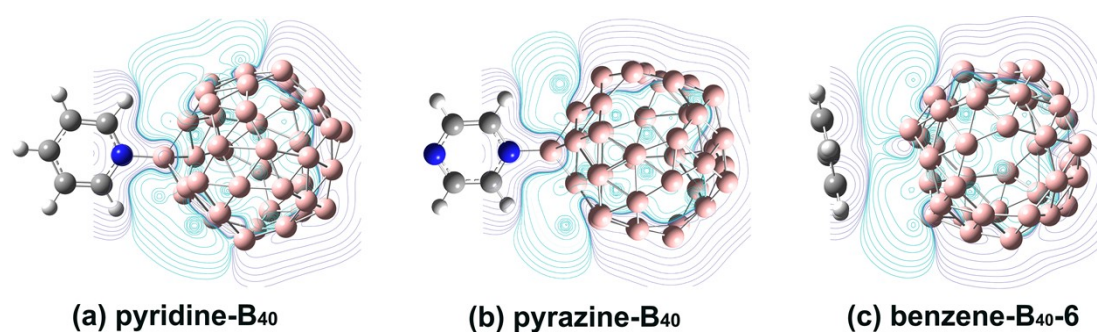

**Figure S1** The analysis of electronic density difference. The purple and blue lines indicate electron accumulation and dissipation, respectively. Isovalue = 0.001 a.u..

## References

- S1 S. F. Boys and F. Bernardi, *Mol. Phys.*, 1970, **19**, 553–566.
- S2 A. Rahmanzadeh, M. Rezvani, M. D. Ganji and M. T. Moghim, *Mater. Today Commun.*, 2023, **36**, 106946.
- S3 M. Mohammadzaheri, S. Jamehbozorgi, M. D. Ganji, M. Rezvani and Z. Javanshir, *Phys. Chem. Chem. Phys.*, 2023, **25**, 21492–21508.
